# Supplementary material for: Merkel-cell carcinoma: ESMO–EURACAN Clinical Practice Guideline for diagnosis, treatment and follow-up
Source: PubMed Central journal article supplement — ESMO Open. 2024 Apr 30;9(5):102977. doi: 10.1016/j.esmoop.2024.102977 (PMC11145756; doi:10.1016/j.esmoop.2024.102977), 2024-04-30
Supplement: mmc1.pdf [file mmc1.pdf]

**Merkel-cell carcinoma: ESMO–EURACAN Clinical Practice Guideline for diagnosis, treatment and follow-up**

**SUPPLEMENTARY MATERIAL**

**Supplementary Table S1. Clinical classification of MCC of the skin according to the UICC TNM (eighth edition)**

| <b>T (primary tumour)</b>     |                                                                                             |
|-------------------------------|---------------------------------------------------------------------------------------------|
| TX                            | Primary tumour cannot be assessed                                                           |
| T0                            | No evidence of primary tumour                                                               |
| Tis                           | Carcinoma <i>in situ</i>                                                                    |
| T1                            | Tumour ≤2 cm in greatest dimension                                                          |
| T2                            | Tumour >2 cm but ≤5 cm in greatest dimension                                                |
| T3                            | Tumour >5 cm in greatest dimension                                                          |
| T4                            | Tumour invades deep extradermal structures, i.e. cartilage, skeletal muscle, fascia or bone |
| <b>N (regional LNs)</b>       |                                                                                             |
| NX                            | Regional LNs cannot be assessed                                                             |
| N0                            | No regional LN metastasis                                                                   |
| N1                            | Regional LN metastasis                                                                      |
| N2                            | In-transit metastasis <sup>a</sup> <i>without</i> LN metastasis                             |
| N3                            | In-transit metastasis <sup>a</sup> <i>with</i> LN metastasis                                |
| <b>M (distant metastasis)</b> |                                                                                             |
| M0                            | No distant metastasis                                                                       |
| M1                            | Distant metastasis                                                                          |
| M1a                           | Skin, subcutaneous tissues or non-regional LN(s)                                            |
| M1b                           | Lung                                                                                        |

|     |               |
|-----|---------------|
| M1c | Other site(s) |
|-----|---------------|

LN, lymph node; MCC, Merkel-cell carcinoma; TNM, tumour–node–metastasis; UICC, Union for International Cancer Control.

<sup>a</sup>In-transit metastasis is a discontinuous tumour distinct from the primary lesion and located between the primary lesion and the draining regional LNs or distal to the primary lesion.

Reprinted with permission from John Wiley & Sons, Inc.<sup>1</sup>

**Supplementary Table S2. pTNM pathological classification of MCC of the skin according to the UICC TNM (eighth edition)**

| <b>pTNM pathological classification</b> |                                                                                                                                                                                                  |
|-----------------------------------------|--------------------------------------------------------------------------------------------------------------------------------------------------------------------------------------------------|
| pN0                                     | Histological examination of a regional lymphadenectomy specimen will ordinarily include six or more LNs. If the LNs are negative but the number ordinarily examined is not met, classify as pN0. |
| pNX                                     | Regional LNs cannot be assessed                                                                                                                                                                  |
| pN0                                     | No regional LN metastasis                                                                                                                                                                        |
| pN1                                     | Regional LN metastasis                                                                                                                                                                           |
| pN1a                                    | (sn) microscopic metastasis detected on SLNB                                                                                                                                                     |
| pN1a                                    | Microscopic metastasis detected on node dissection                                                                                                                                               |
| pN1b                                    | Macroscopic metastasis (clinically apparent)                                                                                                                                                     |
| pN2                                     | In-transit metastasis <sup>a</sup> <i>without</i> LN metastasis                                                                                                                                  |
| pN3                                     | In-transit metastasis <sup>a</sup> <i>with</i> LN metastasis                                                                                                                                     |

The pT category corresponds to the T category.

LN, lymph node; MCC, Merkel-cell carcinoma; pTNM, pathological tumour–node–metastasis; SLNB, sentinel lymph node biopsy; sn, sentinel node; TNM, tumour–node–metastasis; UICC, Union for International Cancer Control.

<sup>a</sup>In-transit metastasis is a discontinuous tumour distinct from the primary lesion and located between the primary lesion and the draining regional LNs or distal to the primary lesion.

Reprinted with permission from John Wiley & Sons, Inc.<sup>1</sup>

**Supplementary Table S3. Clinical stage grouping of MCC of the skin according to the UICC TNM (eighth edition)**

| <b>Stage</b> | <b>T</b> | <b>N</b>   | <b>M</b> |
|--------------|----------|------------|----------|
| <b>0</b>     | Tis      | N0         | M0       |
| <b>I</b>     | T1       | N0         | M0       |
| <b>IIA</b>   | T2, T3   | N0         | M0       |
| <b>IIB</b>   | T4       | N0         | M0       |
| <b>III</b>   | Any T    | N1, N2, N3 | M0       |
| <b>IV</b>    | Any T    | Any N      | M1       |

MCC, Merkel-cell carcinoma; Tis, carcinoma *in situ*; TNM, tumour–node–metastasis; UICC, Union for International Cancer Control.

Reprinted with permission from John Wiley & Sons, Inc.<sup>1</sup>

**Supplementary Table S4. Pathological stage grouping of MCC of the skin according to the UICC TNM (eighth edition)**

| <b>Stage</b> | <b>T</b> | <b>N</b>     | <b>M</b> |
|--------------|----------|--------------|----------|
| <b>0</b>     | Tis      | N0           | M0       |
| <b>I</b>     | T1       | N0           | M0       |
| <b>IIA</b>   | T2, T3   | N0           | M0       |
| <b>IIB</b>   | T4       | N0           | M0       |
| <b>IIIA</b>  | T0       | N1b          | M0       |
|              | T1-4     | N1a, N1a(sn) | M0       |
| <b>IIIB</b>  | T1-T4    | N1b, N2, N3  | M0       |
| <b>IV</b>    | Any T    | Any N        | 1        |

MCC, Merkel-cell carcinoma; sn, sentinel node; Tis, carcinoma *in situ*; TNM, tumour–node–metastasis; UICC, Union for International Cancer Control.

Reprinted with permission from John Wiley & Sons, Inc.<sup>1</sup>

**Supplementary Table S5. ESMO-MCBS table for new therapies/indications in MCC**

| Therapy  | Disease setting                    | Trial                                                                                                     | Control    | Absolute survival gain                                                             | HR (95% CI) | QoL/toxicity                        | ESMO-MCBS score <sup>a</sup>   |
|----------|------------------------------------|-----------------------------------------------------------------------------------------------------------|------------|------------------------------------------------------------------------------------|-------------|-------------------------------------|--------------------------------|
| Avelumab | Adult patients with metastatic MCC | JAVELIN Merkel 200 (Part A – pretreated patients) <sup>2-8</sup><br><br>Phase II<br><br>NCT02155647       | Single arm | ORR: 33.0%<br><br>Median DoR: 40.5 months<br><br>5-year survival: 26% <sup>b</sup> |             | QoL was not a prespecified endpoint | 4 <sup>c</sup><br><br>(Form 3) |
| Avelumab | Adult patients with metastatic MCC | JAVELIN Merkel 200 (Part B – treatment-naive patients) <sup>6-11</sup><br><br>Phase II<br><br>NCT02155647 | Single arm | ORR: 39.7%<br><br>Median DoR: 18.2 months<br><br>Median PFS: 4.1 months            |             | QoL was not a prespecified endpoint | 4 <sup>c</sup><br><br>(Form 3) |

|                            |                                                                                  |                                                                 |            |                                                                                                         |  |  |                   |
|----------------------------|----------------------------------------------------------------------------------|-----------------------------------------------------------------|------------|---------------------------------------------------------------------------------------------------------|--|--|-------------------|
|                            |                                                                                  |                                                                 |            | 1-year survival: 60%                                                                                    |  |  |                   |
| Pembrolizumab <sup>d</sup> | Adult and paediatric patients with recurrent, locally advanced or metastatic MCC | KEYNOTE-017 <sup>12-14</sup><br><br>Phase II<br><br>NCT02267603 | Single arm | ORR: 58%<br><br>Median DoR: NR (>9 months)<br><br>Median PFS: 16.8 months<br><br>3-year survival: 59.4% |  |  | 3<br><br>(Form 3) |

CI, confidence interval; DoR, duration of response; EMA, European Medicines Agency; ESMO-MCBS, ESMO-Magnitude of Clinical Benefit Scale; FDA, Food and Drug Administration; HR, hazard ratio; MCC, Merkel-cell carcinoma; NR, not reached; ORR, objective response rate; PD-1, programmed cell death protein 1; PD-L1, programmed death-ligand 1; PFS, progression-free survival; QoL, quality of life.

<sup>a</sup>ESMO-MCBS version 1.1<sup>15</sup> was used to calculate scores for therapies/indications approved by the EMA or FDA. The scores have been calculated and validated by the ESMO-MCBS Working Group and reviewed by the authors (<https://www.esmo.org/guidelines/esmo-mcbs/esmo-mcbs-evaluation-forms>).

<sup>b</sup>Prior to the use of immunotherapies targeting PD-1 or its major ligand, PD-L1, patients with advanced MCC had an expected 5-year survival of 14%-27%.<sup>16</sup>

<sup>c</sup>MCBS score upgraded based on expanded access and real-world experience.

<sup>d</sup>FDA approved, not EMA approved.



**Supplementary Table S6. Levels of evidence and grades of recommendation  
(adapted from the Infectious Diseases Society of America-United States Public Health Service Grading System<sup>a</sup>)**

**Levels of evidence**

|     |                                                                                                                                                                                                  |
|-----|--------------------------------------------------------------------------------------------------------------------------------------------------------------------------------------------------|
| I   | Evidence from at least one large randomised, controlled trial of good methodological quality (low potential for bias) or meta-analyses of well-conducted randomised trials without heterogeneity |
| II  | Small randomised trials or large randomised trials with a suspicion of bias (lower methodological quality) or meta-analyses of such trials or of trials demonstrated heterogeneity               |
| III | Prospective cohort studies                                                                                                                                                                       |
| IV  | Retrospective cohort studies or case-control studies                                                                                                                                             |
| V   | Studies without control group, case reports, expert opinions                                                                                                                                     |

**Grades of recommendation**

|   |                                                                                                                                       |
|---|---------------------------------------------------------------------------------------------------------------------------------------|
| A | Strong evidence for efficacy with a substantial clinical benefit, strongly recommended                                                |
| B | Strong or moderate evidence for efficacy but with a limited clinical benefit, generally recommended                                   |
| C | Insufficient evidence for efficacy or benefit does not outweigh the risk or the disadvantages (adverse events, costs, etc.), optional |
| D | Moderate evidence against efficacy or for adverse outcome, generally not recommended                                                  |
| E | Strong evidence against efficacy or for adverse outcome, never recommended                                                            |

<sup>a</sup>Reprinted by permission of Oxford University Press on behalf of the Infectious Diseases Society of America.<sup>17</sup>

## REFERENCES

1. Brierley JD, Gospodarowicz MK, Wittekind C.eds. *TNM Classification of Malignant Tumours. 8th edition ed.* Oxford, UK: John Wiley & Sons, Inc; 2016.
2. Kaufman HL, Russell J, Hamid O, et al. Avelumab in patients with chemotherapy-refractory metastatic Merkel cell carcinoma: a multicentre, single-group, open-label, phase 2 trial. *Lancet Oncol.* 2016;17(10):1374-1385.
3. Kaufman HL, Russell JS, Hamid O, et al. Updated efficacy of avelumab in patients with previously treated metastatic Merkel cell carcinoma after  $\geq 1$  year of follow-up: JAVELIN Merkel 200, a phase 2 clinical trial. *J Immunother Cancer.* 2018;6(1):7.
4. D'Angelo SP, Bhatia S, Brohl AS, et al. Avelumab in patients with previously treated metastatic Merkel cell carcinoma: long-term data and biomarker analyses from the single-arm phase 2 JAVELIN Merkel 200 trial. *J Immunother Cancer.* 2020;8(1):e000674.
5. D'Angelo SP, Bhatia S, Brohl AS, et al. Avelumab in patients with previously treated metastatic Merkel cell carcinoma (JAVELIN Merkel 200): updated overall survival data after  $>5$  years of follow-up. *ESMO Open.* 2021;6(6):100290.
6. Bhatia S, Nghiem P, Veeranki SP, et al. Real-world clinical outcomes with avelumab in patients with Merkel cell carcinoma treated in the USA: a multicenter chart review study. *J Immunother Cancer.* 2022;10(8):e004904.
7. Walker JW, Lebbé C, Grignani G, et al. Efficacy and safety of avelumab treatment in patients with metastatic Merkel cell carcinoma: experience from a global expanded access program. *J Immunother Cancer.* 2020;8(1):e000313.
8. Ascierto PA, Orlova K, Grignani G, et al. Avelumab expanded access program in metastatic Merkel cell carcinoma: Efficacy and safety findings from patients in Europe and the Middle East. *Int J Cancer.* 2021;149(11):1926-1934.
9. Bharmal M, Nolte S, Lebbé C, et al. Health-related quality of life trajectory of treatment-naïve patients with Merkel cell carcinoma receiving avelumab. *Future Oncol.* 2020;16(27):2089-2099.
10. Cowey CL, Liu FX, Kim R, et al. Real-world clinical outcomes with first-line avelumab in locally advanced/metastatic Merkel cell carcinoma in the USA: SPEAR-Merkel. *Future Oncol.* 2021;17(18):2339-2350.

11. D'Angelo SP, Lebbé C, Mortier L, et al. First-line avelumab in a cohort of 116 patients with metastatic Merkel cell carcinoma (JAVELIN Merkel 200): primary and biomarker analyses of a phase II study. *J Immunother Cancer*. 2021;9(7):e002646.
12. Nghiem PT, Bhatia S, Lipson EJ, et al. PD-1 Blockade with Pembrolizumab in Advanced Merkel-Cell Carcinoma. *N Engl J Med*. 2016;374(26):2542-2552.
13. Nghiem P, Bhatia S, Lipson EJ, et al. Durable Tumor Regression and Overall Survival in Patients With Advanced Merkel Cell Carcinoma Receiving Pembrolizumab as First-Line Therapy. *J Clin Oncol*. 2019;37(9):693-702.
14. Nghiem P, Bhatia S, Lipson EJ, et al. Three-year survival, correlates and salvage therapies in patients receiving first-line pembrolizumab for advanced Merkel cell carcinoma. *J Immunother Cancer*. 2021;9(4):e002478.
15. Cherny NI, Dafni U, Bogaerts J, et al. ESMO-Magnitude of Clinical Benefit Scale version 1.1. *Ann Oncol*. 2017;28(10):2340-2366.
16. Harms KL, Healy MA, Nghiem P, et al. Analysis of Prognostic Factors from 9387 Merkel Cell Carcinoma Cases Forms the Basis for the New 8th Edition AJCC Staging System. *Ann Surg Oncol*. 2016;23(11):3564-3571.
17. Dykewicz CA. Summary of the guidelines for preventing opportunistic infections among hematopoietic stem cell transplant recipients. *Clin Infect Dis*. 2001;33(2):139-144 (adapted from: Gross PA, Barrett TL, Dellinger EP, et al. Purpose of quality standards for infectious diseases. *Clin Infect Dis*.1994;1918:1421).
